# Supplementary material
Source: PubMed Central journal article supplement (PMC5405766)
Supplement: supp_WNL.0000000000003862_e-tables.pdf [file supp_WNL.0000000000003862_e-tables.pdf]

**Table e-1. Characteristics of the full WRAP cohort and the study sample**

| <b>Characteristic</b>                            | <b>WRAP Cohort,<br/>N=1542</b> | <b>Study sample, N=95</b> |
|--------------------------------------------------|--------------------------------|---------------------------|
| Age, y, mean (SD)                                | 60.8 (6.4)                     | 61.2 (6.0)                |
| Education, y, mean (SD)                          | 16.3 (2.8)                     | 16.6 (2.6)                |
| Female, n (%)                                    | 1088 (70.6)                    | 64 (67.4)                 |
| Amount of moderate exercise, min/week, mean (SD) | 46.18 (63.6)                   | 52.3 (70.8)               |
| Mini-Mental State Examination, mean (SD)         | 29.4 (0.9)                     | 29.3 (0.8)                |
| <i>APOE4</i> (rs429358, rs7412), n (%)           |                                |                           |
| 0 $\epsilon$ 4 alleles                           | 784 (61.2)                     | 62 (65.3)                 |
| 1 $\epsilon$ 4 alleles                           | 444 (34.7)                     | 31 (32.6)                 |
| 2 $\epsilon$ 4 alleles                           | 53 (4.1)                       | 2 (2.1)                   |
| <i>ABCA7</i> (rs4147929), n (%)                  |                                |                           |
| G/G                                              | 850 (68.7)                     | 62 (65.3)                 |
| G/A                                              | 338 (27.3)                     | 30 (31.6)                 |
| A/A                                              | 50 (4.0)                       | 3 (3.2)                   |
| <i>CLU</i> (rs9331896), n (%)                    |                                |                           |
| C/C                                              | 208 (16.8)                     | 14 (14.7)                 |
| T/C                                              | 612 (49.4)                     | 36 (37.9)                 |
| T/T                                              | 420 (33.9)                     | 45 (47.4)                 |

*APOE4*=apolipoprotein E  $\epsilon$ 4 allele, *CLU*=clusterin, *ABCA7*= ATP-binding cassette transporter A7

**Table e-2. Participants' scores on cognitive tests utilized in WRAP consensus conference.**

| <b>Characteristic (N=95)</b>                 | <b>Raw Score</b> | <b>Z Score</b> | <b>Percentile</b> |
|----------------------------------------------|------------------|----------------|-------------------|
| <b>Language and Verbal Ability</b>           |                  |                |                   |
| Boston Naming Test                           | 57.0 (2.7)       | 0.03           | 51.2              |
| <b>Visual Spatial</b>                        |                  |                |                   |
| Clock Draw                                   | 9.7 (0.6)        | 0.22           | 58.3              |
| <b>Learning and Memory</b>                   |                  |                |                   |
| Rey Auditory Verbal Learning Test (AVLT)     |                  |                |                   |
| AVLT Total                                   | 52.1 (7.6)       | -0.11          | 45.6              |
| AVLT Long Delay                              | 10.7 (2.7)       | -0.12          | 45.2              |
| WMS-R Logical Memory                         |                  |                |                   |
| Immediate Total                              | 30.2 (6.3)       | 0.08           | 53.2              |
| Delayed Total                                | 26.9 (7.2)       | 0.06           | 52.4              |
| BVMT Immediate Total                         | 24.6 (6.3)       | -0.04          | 48.4              |
| BVMT Delayed Total                           | 9.4 (2.3)        | -0.17          | 43.3              |
| <b>Executive Function and Working Memory</b> |                  |                |                   |
| WAIS-III Working Memory                      |                  |                |                   |
| Digit Span Forward                           | 10.6 (2.0)       | 0.00           | 50.0              |
| Digit Span Backward                          | 7.0 (2.0)        | -0.05          | 48.0              |
| Letter-Number Sequencing                     | 10.4 (2.3)       | -0.25          | 40.1              |
| Trail Making Test A                          | 25.6 (6.8)       | -0.07          | 47.2              |
| Trail Making Test B                          | 58.8 (18.6)      | -0.10          | 46.0              |
| WAIS-R Digit Symbol                          | 57.4 (9.4)       | -0.01          | 49.6              |
| Stroop Color Word Test                       | 109.0 (17.8)     | -0.08          | 46.8              |

**Raw scores are means (SD). Z scores and percentiles were calculated based on normative test data from larger WRAP cohort.<sup>1</sup>**

WMS-R= Wechsler Memory Scale-Revised; BVMT= Brief Visuospatial Memory Test; WAIS-III= Wechsler Adult Intelligence Scale-Third Edition; WAIS-R= Wechsler Adult Intelligence Scale-Revised

1. Clark LR, Kosciak RL, Nicholas CR, et al. Mild Cognitive Impairment in Late Middle Age in the Wisconsin Registry for Alzheimer's Prevention Study: Prevalence and Characteristics Using Robust and Standard Neuropsychological Normative Data. *Arch Clin Neuropsychol*. 2016.
